# Supplementary material for: Exosomal miR‐1470 is a diagnostic biomarker and promotes cell proliferation and metastasis in colorectal cancer
Source: PubMed Central journal article supplement (PMC10974715; doi:10.1002/cam4.7117), 2024-03-28

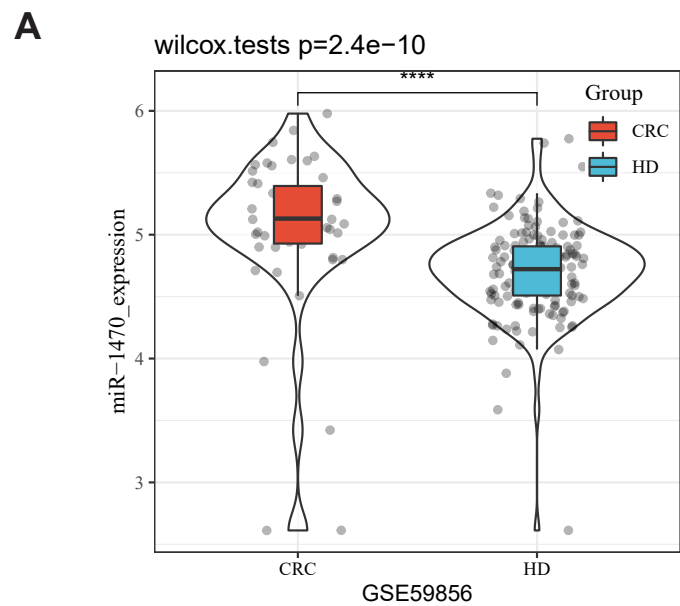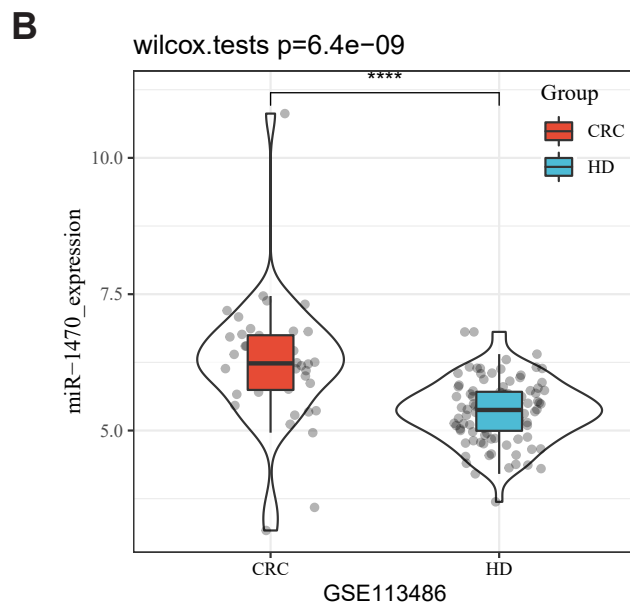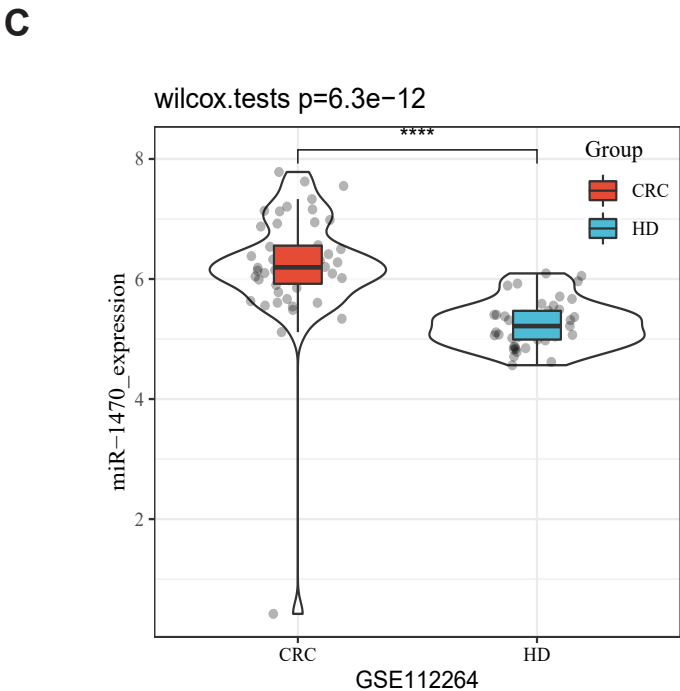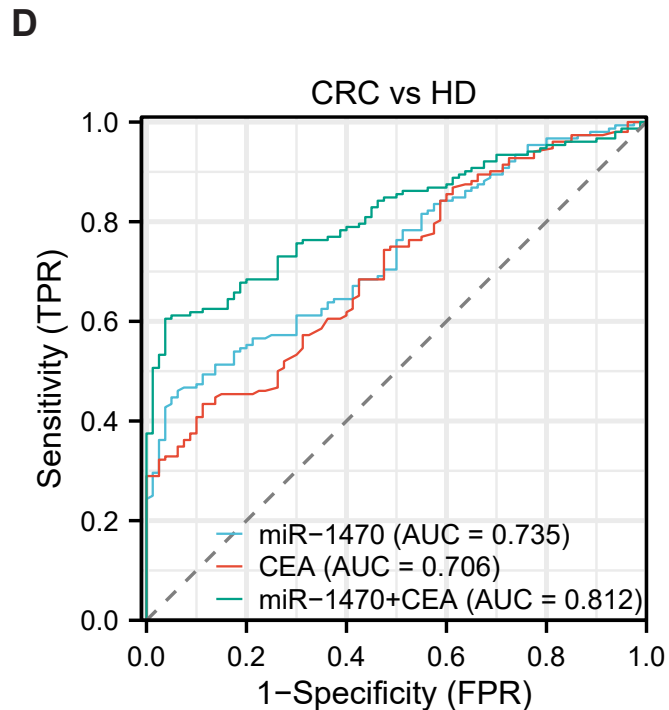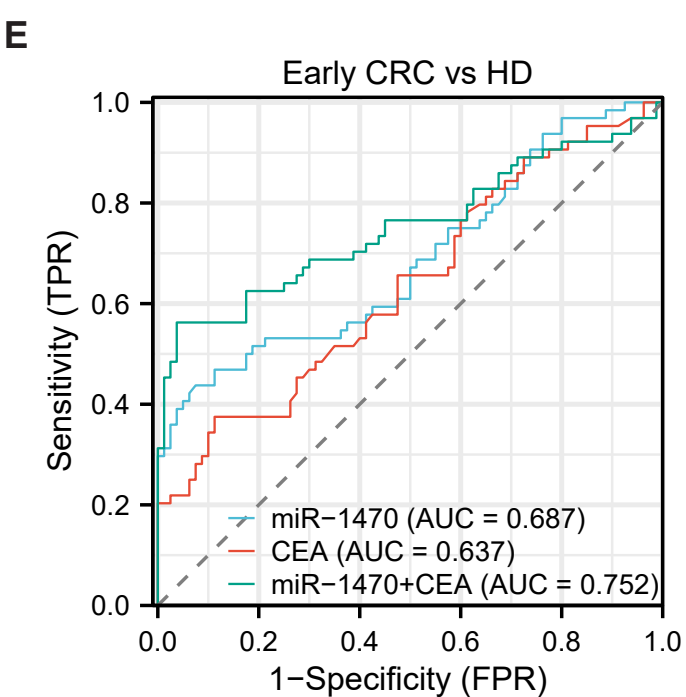

Supplement: CAM4-13-e7117-s002.pdf [file CAM4-13-e7117-s002.pdf]
